# Supplementary material for: Current carbon policies and emerging emission control technologies in the dairy supply chain
Source: Research Square preprint supplement (doi:10.21203/rs.3.rs-5672225/v1), 2025-01-13
Supplement: Supplementary file 1 [file 4d3ca2dcd1c12c53d79b365d.xlsx]

## Sheet: Fig.1 Reference (27)+data
Author / Year	Title of reference	DOI	Reigon/Country	Enteric fermentation	Manure management	Feed production	Energy consumption	Other stage	Total Carbon Footprint
Hawkins et al., 2021	Feeding efficiency gains can increase the greenhouse gas mitigation potential of the Tanzanian dairy sector	https://www.nature.com/articles/s41598-021-83475-8	Tanzania	2.0485	0.3615	3.2535	0.3615		6.025
Gonzalez-Quintero et al., 2021	Carbon footprint, non-renewable energy and land use of dual-purpose cattle systems in Colombia using a life cycle assessment approach	https://doi.org/10.1016/j.livsci.2020.104330	Colombia	3.569	0.258	0.473			4.3
Mazzetto et al., 2020	Comparing the environmental efficiency of milk and beef production through life cycle assessment of interconnected cattle systems	https://doi.org/10.1016/j.jclepro.2020.124108	Costa Rica	3.2938	0.0383	0.4979	0		3.83
Wilkes et al., 2020	Variation in the carbon footprint of milk production on smallholder dairy farms in central Kenya	https://doi.org/10.1016/j.jclepro.2020.121780	Kenya	1.65945	0.37674	0.94484	0.00897		2.99
Balcha et al., 2022	Carbon footprint of cows’ milk: a case study of peri-urban and urban dairy farms within Mekelle milk-shed, Ethiopia	https://doi.org/10.1080/17583004.2022.2039301	Ethiopia	1.7892	0.1284	0.4704	0.012		2.4
Garg et al., 2016	Carbon footprint of milk production under smallholder dairying in Anand district of Western India: a cradle-to-farm gate life cycle assessment	https://doi.org/10.1071/AN15464	India	1.5246	0.1782	0.3806	0.1166		2.2
Thoma et al., 2013	Greenhouse gas emissions from milk production and consumption in the United States: A cradle-to-grave life cycle assessment circa 2008	https://doi.org/10.1016/j.idairyj.2012.08.013	USA	0.5125	0.492	0.3875	0.082	0.576	2.05
Daneshi et al., 2014	Greenhouse gas emissions of packaged fluid milk production in Tehran	https://doi.org/10.1016/j.jclepro.2014.05.057	Iran	0.52419	0.15224	0.7266	0.20068	0.12629	1.73
Llontop et al., 2022	Milk carbon footprint of silvopastoral dairy systems in the Northern Peruvian Amazon	https://doi.org/10.1007/s11250-022-03224-5	Peru	1.34	0.2	0.1	0.04		1.68
Famiglietti et al., 2019	Development and testing of the Product Environmental Footprint Milk Tool: A comprehensive LCA tool for dairy products	https://doi.org/10.1016/j.scitotenv.2018.08.142	Italy	0.46859	0.25232	0.55526	0.07755	0.07426	1.42798
Wang et al., 2018	Environmental impacts and resource use of milk production on the North China Plain, based on life cycle assessment	https://doi.org/10.1016/j.scitotenv.2017.12.259	China	0.7035	0.134	0.3484	0.1608		1.3467
Cortés et al., 2021	Pursuing the route to eco-efficiency in dairy production: The case of Galician area	https://doi.org/10.1016/j.jclepro.2020.124861	Spain	0.53599	0.28861	0.4389	0.0665		1.33
Styles et al., 2017; Hietala et al., 2014	Climate mitigation by dairy intensification depends on intensive use of spared grassland;Carbon footprints of organic dairying in six European countries—real farm data analysis	https://doi.org/10.1111/gcb.13868; https://doi.org/10.1007/s13165-014-0084-0	United Kingdom	0.5136	0.317	0.19715	0.19725		1.225
Lambotte et al., 2020	Carbon footprint and economic performance of dairy farms: The case of protected designation of origin farms in France	https://doi.org/10.1016/j.agsy.2020.102979	France	0.6534	0.2057	0.2541	0.096		1.21
van Boxmeer et al., 2021	Environmental and economic performance of Dutch dairy farms on peat soil	https://doi.org/10.1016/j.agsy.2021.103243	Netherlands	0.513	0.1254	0.3192	0.1824		1.14
Gross et al., 2022	The carbon footprint of milk during the conversion from conventional to organic production on a dairy farm in central Germany	https://doi.org/10.1007/s13593-022-00775-7	Germany	0.46	0.1	0.455	0.115		1.13
Huerta et al., 2018	Comparison of greenhouse gas emissions from Mexican intensive dairy farms	http://dx.doi.org/10.4314/sajas.v48i1.6	Mexican	0.446	0.133	0.186	0.365		1.13
Titis Apdini et al., 2021	Understanding variability in greenhouse gas emission estimates of smallholder dairy farms in Indonesia	https://doi.org/10.1007/978-3-642-28777-0_1	Indonesia	0.62	0.155	0.33	0.01		1.115
O'Brien et al., 2014	An appraisal of carbon footprint of milk from commercial grass-based dairy farms in Ireland according to a certified life cycle assessment methodology	https://doi.org/10.1007/s11367-014-0755-9	Ireland						1.11
Jayasundara et al., 2019	Improving farm profitability also reduces the carbon footprint of milk production in intensive dairy production systems	https://doi.org/10.1016/j.jclepro.2019.04.013	Canada	0.47806	0.19557	0.39114	0.02173		1.0865
Darré et al., 2020	Do pasture-based mixed dairy systems with higher milk production have lower environmental impacts? A Uruguayan case study	https://doi.org/10.1080/00288233.2020.1750433	Uruguay						0.84
Ledgard et al., 2020	Temporal, spatial, and management variability in the carbon footprint of New Zealand milk	https://doi.org/10.3168/jds.2019-17182	New zealand	0.567	0.1053	0.1215	0.0162		0.81
Sejian et al., 2018	Assessment of the carbon footprint of four commercial dairy production systems in Australia using an integrated farm system model	https://doi.org/10.1080/17583004.2017.1418595	Australia	0.39004	0.28711	0.0522	0.02482		0.75417
Maria de Léis et al., 2014	Carbon footprint of milk production in Brazil: a comparative case study	https://doi.org/10.1007/s11367-014-0813-3	Brazil	0.312	0.0573333	0.31	0.00733333		0.686667
Schueler et al., 2018	Discrimination of milk carbon footprints from different dairy farms when using IPCC Tier 1 methodology for calculation of GHG emissions from managed soils	https://doi.org/10.1016/j.jclepro.2017.12.227	Norway						0.57
Hietala et al., 2014	Carbon footprints of organic dairying in six European countries—real farm data analysis	https://doi.org/10.1007/s13165-014-0084-0	Finland	0.535	0.395	0.1545	0.3355		1.42
			Belgium	0.525	0.335	0.163	0.142		1.165
			Denmark	0.625	0.33	0.092	0.183		1.23
			Austria	0.75	0.45	0.013	0.317		1.53
Styles et al., 2017	Climate mitigation by dairy intensification depends on intensive use of spared grassland	https://doi.org/10.1111/gcb.13868	United Kingdom (1)	0.3672	0.204	0.1938	0.255		1.02
Hietala et al., 2014	Carbon footprints of organic dairying in six European countries—real farm data analysis	https://doi.org/10.1007/s13165-014-0084-0	United Kingdom (2)	0.66	0.43	0.2005	0.1395		1.43

## Sheet: Fig.2 Reference+data
Author / Year	Title of reference	DOI	Enteric fermentation	Manure management	Feed production	Energy consumption	Process energy	Packaging material	Raw milk transport	Packaged milk distribution	Waste transport	Retail energy	Refrigerants	Waste disposal
Hawkins et al., 2021	Feeding efficiency gains can increase the greenhouse gas mitigation potential of the Tanzanian dairy sector	https://doi.org/10.1038/s41598-021-89524-6	2.0485	0.3615	3.2535	0.3615
Mazzetto et al., 2020	Comparing the environmental efficiency of milk and beef production through life cycle assessment of interconnected cattle systems	https://doi.org/10.1016/j.jclepro.2020.124108	3.2938	0.0383	0.4979	0
Gonzalez-Quintero et al., 2021	Carbon footprint, non-renewable energy and land use of dual-purpose cattle systems in Colombia using a life cycle assessment approach	https://doi.org/10.1016/j.livsci.2020.104330	3.569	0.258	0.473
Wilkes et al., 2020	Variation in the carbon footprint of milk production on smallholder dairy farms in central Kenya	https://doi.org/10.1016/j.jclepro.2020.121780	1.65945	0.37674	0.94484	0.00897
Thoma et al., 2013	Greenhouse gas emissions from milk production and consumption in the United States: A cradle-to-grave life cycle assessment circa 2008	https://doi.org/10.1016/j.idairyj.2012.08.013	0.5125	0.492	0.3875	0.082
Wang et al., 2018	Environmental impacts and resource use of milk production on the North China Plain, based on life cycle assessment	https://doi.org/10.1016/j.scitotenv.2017.12.259	0.7035	0.134	0.3484	0.1608
Garg et al., 2016	Carbon footprint of milk production under smallholder dairying in Anand district of Western India: a cradle-to-farm gate life cycle assessment	https://doi.org/10.1071/AN15464	1.5246	0.1782	0.3806	0.1166
Daneshi et al., 2014	Greenhouse gas emissions of packaged fluid milk production in Tehran	https://doi.org/10.1016/j.jclepro.2014.05.057	0.52419	0.15224	0.7266	0.20068
Gross et al., 2022	The carbon footprint of milk during the conversion from conventional to organic production on a dairy farm in central Germany	https://doi.org/10.1007/s13593-022-00775-7	0.46	0.1	0.455	0.115
Lambotte et al., 2020	Carbon footprint and economic performance of dairy farms: The case of protected designation of origin farms in France	https://doi.org/10.1016/j.agsy.2020.102979	0.6534	0.2057	0.2541	0.096
van Boxmeer et al., 2021	Environmental and economic performance of Dutch dairy farms on peat soil	https://doi.org/10.1016/j.agsy.2021.103243	0.513	0.1254	0.3192	0.1824
Famiglietti et al., 2019	Development and testing of the Product Environmental Footprint Milk Tool: A comprehensive LCA tool for dairy products	https://doi.org/10.1016/j.scitotenv.2018.08.142	0.46859	0.25232	0.55526	0.07755
Sejian et al., 2018	Assessment of the carbon footprint of four commercial dairy production systems in Australia using an integrated farm system model	https://doi.org/10.1080/17583004.2017.1418595	0.39004	0.28711	0.0522	0.02482
Cortés et al., 2021	Pursuing the route to eco-efficiency in dairy production: The case of Galician area	https://doi.org/10.1016/j.jclepro.2020.124861	0.53599	0.28861	0.4389	0.0665
Jayasundara et al., 2019	Improving farm profitability also reduces the carbon footprint of milk production in intensive dairy production systems	https://doi.org/10.1016/j.jclepro.2019.04.013	0.47806	0.19557	0.39114	0.02173
Ledgard et al., 2020	Temporal, spatial, and management variability in the carbon footprint of New Zealand milk	https://doi.org/10.3168/jds.2019-17182	0.567	0.1053	0.1215	0.0162
Llontop et al., 2022	Milk carbon footprint of silvopastoral dairy systems in the Northern Peruvian Amazon	https://doi.org/10.1007/s11250-022-03224-5	1.34	0.2	0.1	0.04
Titis Apdini et al., 2021	Understanding variability in greenhouse gas emission estimates of smallholder dairy farms in Indonesia	https://doi.org/10.1007/978-3-642-28777-0_1	0.62	0.155	0.33	0.01
Balcha et al., 2022	Carbon footprint of cows’ milk: a case study of peri-urban and urban dairy farms within Mekelle milk-shed, Ethiopia	https://doi.org/10.1080/17583004.2022.2039301	1.7892	0.1284	0.4704	0.012
Maria de Léis et al., 2014	Carbon footprint of milk production in Brazil: a comparative case study	https://doi.org/10.1007/s11367-014-0813-3	0.312	0.0573333	0.31	0.00733333
Huerta et al., 2018	Comparison of greenhouse gas emissions from Mexican intensive dairy farms	http://dx.doi.org/10.4314/sajas.v48i1.6	0.446	0.133	0.186	0.365
Styles et al., 2017	Climate mitigation by dairy intensification depends on intensive use of spared grassland	https://doi.org/10.1111/gcb.13868	0.3672	0.204	0.1938	0.255
Hietala et al., 2014	Carbon footprints of organic dairying in six European countries—real farm data analysis	https://doi.org/10.1007/s13165-014-0084-0	0.535	0.395	0.1545	0.3355
			0.625	0.33	0.092	0.183
			0.525	0.335	0.163	0.142
			0.75	0.45	0.013	0.317
			0.66	0.43	0.2005	0.1395
Nutter et al., 2013	Greenhouse gas emission analysis for USA fluid milk processing plants: Processing, packaging, and distribution	https://doi.org/10.1016/j.idairyj.2012.09.011					0.0771	0.0541		0.072				——
Coluccia et al., 2022	Assessing the carbon footprint across the supply chain: Cow milk vs soy drink	https://doi.org/10.1016/j.scitotenv.2021.151200					0.086	0.038	0.031
Zhao et al., 2017	Carbon footprint assessment for a local branded pure milk product: a lifecycle-based approach.	https://doi.org/10.1590/1678-457X.02717					0.059	0.122	0.03	0.04	0.003			0.069
Flysjö, 2012	Greenhouse gas emissions in milk and dairy product chains	http://pure.au.dk/portal/files/45485022/Anna_20Flusj_.pdf					0.05		0.07
Thomas et al. 2013	Greenhouse gas emissions from milk production and consumption in the United States: A cradle-to-grave life cycle assessment circa 2008	https://doi.org/10.1016/j.idairyj.2012.08.013					0.077	0.054		0.072		0.12	0.01731	0.1025
Misganaw et al., 2020	Carbon footprint in the downstream dairy value chain in Ziway‑Hawassa milk shed, Ethiopia	https://doi.org/10.1007/s10668-020-00968-8					0.16		0.062	0.068
Torquati et al.,2015	Evaluating the CO2 emission of the milk supply chain in Italy: An exploratory study	https://doi.org/10.3390/su7067245								0.05242
FAO, 2010	Greenhouse Gas Emissions from the Dairy Sector—A Life Cycle Assessment	https://www.uncclearn.org/wp-content/uploads/library/fao149.pdf					0.086		0.031
Vergé et al., 2013	Carbon footprint of Canadian dairy products: calculations and issues.	https://doi.org/10.3168/jds.2013-6563							0.072			0.019
Ioanna Malliaroudaki et al., 2022	Energy management for a net zero dairy supply chain under climate change	https://doi.org/10.1016/j.tifs.2022.01.015					0.07	0.066				0.11	0.014
Heller et al., 2011	Life Cycle Energy and Greenhouse Gas Analysis of a Large-Scale Vertically Integrated Organic Dairy in the United States	https://doi.org/10.1021/es102794m					0.077	0.12				0.1		0.09
Daneshi et al., 2014	Greenhouse gas emissions of packaged fuid milk production in Tehran	https://doi.org/10.1016/j.jclepro.2014.05.057					0.095	0.054
Kumar et al., 2021	Life cycle assessment (LCA) of dairy processing industry: A case study of North India	https://doi.org/10.1016/j.jclepro.2021.129331					0.094	0.068
Jungbluth et al., 2018	Life cycle assessment of a detailed dairy processing model and recommendations for the allocation to single products	https://doi.org/10.1007/s11367-017-1392-x					0.167	0.12

## Sheet: Fig.3 Reference+data
Author/Year	Title of reference	DOI/Link	Supply chain	Dairy type	Value	Unit
Djekic et al.， 2014	Environmental life-cycle assessment of various dairy products	https://doi.org/10.1016/j.jclepro.2013.12.054	Cradle-to-grave	Pasteurized milk	1.25-1.67	kg CO2/kg
				ultra high temperature milk	1.24-1.38	kg CO2/kg
				Yogurt	1.42-2.63	kg CO2/kg
				Cheese	6.73-9.47	kg CO2/kg
				Butter	20.69-21.30	kg CO2/kg
				Cream	3.52-4.53	kg CO2/kg
Doublet et al.，2013	Life cycle assessment of Romanian beef and dairy products	https://esu-services.ch/fileadmin/download/doublet-2013-SENSE_Deliverable-2_1-LCAbeefdairy.pdf		Pasteurized milk	1.93	kg CO2/kg
				Yogurt	3.04	kg CO2/kg
				Cheese	7.8	kg CO2/kg
				Butter	10.5	kg CO2/kg
Vasilaki et al., 2016	Water and carbon footprint of selected dairy products: a case study in Catalonia	https://doi.org/10.1016/j.jclepro.2016.08.032		Yogurt	1.94	kg CO2/kg
González-García et al., 2013a	Environmental life cycle assessment of a dairy product: the yoghurt	https://doi.org/10.1007/s11367-012-0522-8		Yogurt	1.776	kg CO2/kg
Üçtuğ et al., 2019	nvironmental life cycle assessment of yoghurt supply to consumer in Turkey	https://doi.org/10.1016/j.jclepro.2019.01.127		Yogurt	4.2	kg CO2/kg
Riva et al., 2016	Environmental life cycle assessment of Italian mozzarella cheese: Hotspots and improvement opportunities	https://doi.org/10.3168/jds.2016-12396		Cheese	6.66	kg CO2/kg HM
Santos et al., 2022	Life Cycle Assessment of Dairy Products: A Case Study of a Dairy Factory in Brazil	https://doi.org/10.3390/su14159646	Cardle-to-processing	Yogurt	1.82	kg CO2/kg
				Milk	1.545	kg CO2/kg
				Butter	13.888	kg CO2/kg
				Cheese	16.306	kg CO2/kg
				Cheese dip	0.04	kg CO2/kg
				Whole milk	4.83	kg CO2/kg
Santos et al., 2017	Life cycle assessment of cheese production process in a small-sized dairy industry in Brazil	https://doi.org/10.1007/s11356-016-8084-0		Cheese	14.447	kg CO2/kg
Finnegan et al., 2017	Global warming potential associated with Irish milk powder production	https://doi.org/10.1007/s11783-017-0949-z		Milk powder	9.731	kg CO2/kg
Finnegan et al., 2017	Global warming potential associated with dairy products in the Republic of Ireland	https://doi.org/10.1016/j.jclepro.2015.08.025		Liquid milk	1.589	kg CO2/kg
				Butter	9.68	kg CO2/kg
				Cheese	7.203	kg CO2/kg
				Cream	5.063	kg CO2/kg
				Milk powder	12.353	kg CO2/kg
				Powdered whey	13.108	kg CO2/kg
Kim et al., 2013	Life cycle assessment of cheese and whey production in the USA	https://doi.org/10.1007/s11367-013-0553-9		Cheddar cheese	11.127	kg CO2/kg
González-García et al., 2013b	Environmental Life Cycle Assessment of a Galician cheese: San Simon da Costa	https://doi.org/10.1016/j.jclepro.2013.03.006		Galician cheese	10.44	kg CO2/kg
Kim et al., 2013	Life cycle assessment of cheese and whey production in the USA	https://doi.org/10.1007/s11367-013-0553-9		Cheese	11.27	kg CO2/kg
van Middelaar et al., 2011	Eco-efficiency in the production chain of Dutch semi-hard cheese	https://doi.org/10.1016/j.livsci.2011.03.013		Cheese	8.09	kg CO2/kg
Berlin, 2002	Environmental life cycle assessment (LCA) of Swedish semi-hard cheese	https://doi.org/10.1016/S0958-6946(02)00112-7		Cheese	8.685	kg CO2/kg
Finnegan et al., 2017	Global warming potential associated with dairy products in the Republic of Ireland	https://doi.org/10.1016/j.jclepro.2015.08.025		Cheese	7.203	kg CO2/kg
Djekic et al., 2014	Environmental life-cycle assessment of various dairy products	https://doi.org/10.1016/j.jclepro.2013.12.054		Liquid milk	1.25-1.67	kg CO2/kg
Vergé et al., 2013	Carbon footprint of Canadian dairy products: calculations and issues	https://doi.org/10.3168/jds.2013-6563		Liquid milk	0.944	kg CO2/kg
Fantin et al., 2012	Life cycle assessment of Italian high quality milk production. A comparison with an EPD study	https://doi.org/10.1016/j.jclepro.2011.10.017		Liquid milk	1.261	kg CO2/kg
Finnegan et al., 2017	Global warming potential associated with dairy products in the Republic of Ireland	https://doi.org/10.1016/j.jclepro.2015.08.025		Liquid milk	1.589	kg CO2/kg
Finnegan et al., 2017	Environmental impacts of milk powder and butter manufactured in the Republic of Ireland	https://doi.org/10.1016/j.scitotenv.2016.10.237		Skim milk powder	1.52	kg CO2/kg
				Full-fat milk powder	1.088	kg CO2/kg
				Full cream milk powder	0.925	kg CO2/kg
				Milk powder (average)	1.482	kg CO2/kg
				Butter	0.528	kg CO2/kg
Liao et al., 2020	Large-scale regionalised LCA shows that plant-based fat spreads have a lower climate, land occupation and water scarcity impact than dairy butter	https://doi.org/10.1007/s11367-019-01703-w		Butter	12.1	kg CO2/kg
Rossi et al., 2024	Carbon Footprint and Carbon Sink of a Local Italian Dairy Supply Chain	https://doi.org/10.3390/dairy5010017	Production-retail	Fresh raw milk	4.39	kg CO2/kg
				Yogurt	5.1	kg CO2/kg
				Mozzarella cheese	9.82	kg CO2/kg
				Fresh cheese	8.4	kg CO2/kg
				Aged cheese	15.34	kg CO2/kg
Kumar et al., 2021	Life cycle assessment (LCA) of dairy processing industry: A case study of North India	https://doi.org/10.1016/j.jclepro.2021.129331		Butter	0.329	kg CO2/kg
				Dahi	0.256	kg CO2/kg
				Ghee	0.189	kg CO2/kg
				Ice cream	0.359	kg CO2/kg
				Lassi	0.256	kg CO2/kg
				Panner	0.389	kg CO2/kg
				Processed milk	0.0734	kg CO2/kg
Gaillac et al., 2021	The carbon footprint of meat and dairy proteins: A practical perspective to guide low carbon footprint dietary choices	https://doi.org/10.1016/j.jclepro.2021.128766	Production-processing	Cheese	8.55-18.6	kg CO2/kg
				Yogurt	1.31-2.88	kg CO2/kg
				Milk	1.22-2.8	kg CO2/kg
				Sheep milk	2.09-8.4	kg CO2/kg
				Goat milk	1.31-5.2	kg CO2/kg
				buffalo milk	2.6-6.6	kg CO2/kg
Egas et al., 2020	CalcPEFDairy: A Product Environmental Footprint compliant tool for a tailored assessment of raw milk and dairy products	https://doi.org/10.1016/j.jenvman.2019.110049		Raw milk	1	kg CO2/kg FPCM
				Cheese	9.9	kg CO2/kg DM
				Yogurt	1.12	kg CO2/kg
Canellada et al., 2018	Environmental impact of cheese production: A case study of a small-scale factory in southern Europe and global overview of carbon footprint	https://doi.org/10.1016/j.scitotenv.2018.04.045		Cheese	10.2	kg CO2/kg
Bava et al., 2018	Impact assessment of traditional food manufacturing: the case of Grana Padano cheese	https://doi.org/10.1016/j.scitotenv.2018.01.143			10.3-16.9	kg CO2/kg
Clune et al., 2017	Systematic review of greenhouse gas emissions for different fresh food categories	https://doi.org/10.1016/j.jclepro.2016.04.082			5.3-16.4	kg CO2/kg
Vagnoni et al., 2017	Carbon footprint of cheese produced on milk from Holstein and Jersey cows fed hay differing in herb content	https://doi.org/10.1016/j.jclepro.2015.03.087			9.9-12.7	kg CO2/kg
Dalla Riva et al., 2016	Environmental life cycle assessment of Italian mozzarella cheese: hotspots and improvement opportunities	https://doi.org/10.3168/jds.2016-12396			6.66	kg CO2/kg
Djekic et al., 2014	Environmental life-cycle assessment of various dairy products	https://doi.org/10.1016/j.jclepro.2013.12.054			6.7-9.5	kg CO2/kg
González-García et al., 2013c	Environmental performance of a Portuguese mature cheese-making dairy mill	https://doi.org/10.1016/j.jclepro.2012.10.010			7.5	kg CO2/kg
González-García et al., 2013b	Environmental life cycle assessment of a Galician cheese: San Simon da Costa	https://doi.org/10.1016/j.jclepro.2013.03.006			10.4	kg CO2/kg
Kim et al., 2013	Life cycle assessment of cheese and whey production in the USA	https://doi.org/10.1007/s11367-013-0553-9			7.3-8.6	kg CO2/kg
Vergé et al., 2013	Carbon footprint of Canadian dairy products: calculations and issues	https://doi.org/10.3168/jds.2013-6563			4.2-5.7	kg CO2/kg
Capper and Cady, 2012	A comparison of the environmental impact of Jersey compared with Holstein milk for cheese production	https://doi.org/10.3168/jds.2011-4360			12.9-16.2	kg CO2/kg
Van Middelaar et al., 2011	Eco-efficiency in the production chain of Dutch semi-hard cheese	https://doi.org/10.1016/j.livsci.2011.03.013			8.5	kg CO2/kg
Sheane et al., 2011	Identifying Opportunities to Reduce the Carbon Footprint Associated with the Scottish Dairy Supply Chain – Main Report	https://digital.nls.uk/pubs/scotgov/2011/scottishdairysupplychain.pdf#:~:text=A%20research%20%EE%80%80project%EE%80%81%20to%20assess%20global%20greenhouse			11.1	kg CO2/kg
Yan et al., 2018	Life cycle assessment of multi-product dairy processing using Irish butter and milk powders as an example	https://doi.org/10.1016/j.jclepro.2018.07.006	Processing	Butter	0.4-0.62	kg CO2/kg
				Skimmed milk powder	1.4-1.7	kg CO2/kg
				Lipofilling Powder	1.65	kg CO2/kg
Flysjö et al., 2014	Method to assess the carbon footprint at product level in the dairy industry	https://doi.org/10.1016/j.idairyj.2013.07.016	Farm-consumption	Fresh milk	1.1	kg CO2/kg
				Butter and mixtures	8.1	kg CO2/kg
				Cheese	6.5	kg CO2/kg
				Milk powder	7.4	kg CO2/kg
				Whey-based products	1.2	kg CO2/kg
Vergé et al., 2013	Carbon footprint of Canadian dairy products: Calculations and issues	https://doi.org/10.3168/jds.2013-6563	Farm-processing (non-packaged products)	Cheese	5.3	kg CO2/kg
				Cream	2.1	kg CO2/kg
				Sour cream	2.5	kg CO2/kg
				Yogurt	1.5	kg CO2/kg
				Liquid milk	1	kg CO2/kg
				Buttermilk	1.1	kg CO2/kg
				Frozen dairy products	2.1	kg CO2/kg
				Milk powder	10.1	kg CO2/kg
				Concentrated milk	3.1	kg CO2/kg
				Butter	7.3	kg CO2/kg

## Sheet: Fig.4 and Table 1 Reference
Authors	Article Title	Source Title	Publication Year	DOI
Miserocchi, L et al., 2024	A novel approach to energy management in the dairy industry using performance indicators and load profiles: Application to a cheese dairy plant in Tuscany, Italy	ENERGY	2024	https://doi.org/10.1016/j.energy.2024.133240
de Ondarza, MB et al., 2024	Understanding potential opportunities and risks associated with feeding supplemental rumen available fats to mitigate enteric methane emissions in lactating dairy cows	JOURNAL OF DAIRY SCIENCE	2024	https://doi.org/10.3168/jds.2023-24528
Zhou, MG et al., 2024	A green approach for non-thermal concentration of skim milk by forward osmosis combined with membrane distillation for draw solution regeneration	CHEMICAL ENGINEERING RESEARCH & DESIGN	2024	https://doi.org/10.1016/j.cherd.2024.09.007
Varga, ZI et al., 2024	Ammonia and Greenhouse Gas Emissions from Organic Manure Composting: The Effect of Membrane Cover	AGRONOMY-BASEL	2024	https://doi.org/10.3390/agronomy14071471
Abyar, H et al., 2024	Life cycle and efficiency assessment of fixed-bed bioreactor using recycled shredded plastics compared with conventional activated sludge bioreactor for dairy wastewater treatment	JOURNAL OF WATER PROCESS ENGINEERING	2024	https://doi.org/10.1016/j.jwpe.2024.105676
Zielinski, M et al., 2021	Microwave Radiation Influence on Dairy Waste Anaerobic Digestion in a Multi-Section Hybrid Anaerobic Reactor (M-SHAR)	PROCESSES	2021	https://doi.org/10.3390/pr9101772
Gaillac, R et al., 2021	The carbon footprint of meat and dairy proteins: A practical perspective to guide low carbon footprint dietary choices	JOURNAL OF CLEANER PRODUCTION	2021	https://doi.org/10.1016/j.jclepro.2021.128766
Manzanilla-Pech, CIV et al., 2021	Breeding for reduced methane emission and feed-efficient Holstein cows: An international response	JOURNAL OF DAIRY SCIENCE	2021	https://doi.org/10.3168/jds.2020-19889
Fang, C et al., 2021	Effects of semi-permeable membrane covering coupled with intermittent aeration on gas emissions during aerobic composting from the solid fraction of dairy manure at industrial scale	WASTE MANAGEMENT	2021	https://doi.org/10.1016/j.wasman.2021.05.030
Blazejewski, T et al., 2021	Reimagining the milk supply chain: Reusable vessels for bulk delivery	SUSTAINABLE PRODUCTION AND CONSUMPTION	2021	https://doi.org/10.1016/j.spc.2021.02.030
Ahrens, MU et al., 2020	Integrated high temperature heat pumps and thermal storage tanks for combined heating and cooling in the industry	APPLIED THERMAL ENGINEERING	2021	https://doi.org/10.1016/j.applthermaleng.2021.116731
Chamberland, J et al., 2020	Integrating reverse osmosis to reduce water and energy consumption in dairy processing: a predictive analysis for Cheddar cheese manufacturing plants	JOURNAL OF WATER PROCESS ENGINEERING	2020	https://doi.org/10.1016/j.jwpe.2020.101606
Impraim, R et al., 2020	Lignite Improved the Quality of Composted Manure and Mitigated Emissions of Ammonia and Greenhouse Gases during Forced Aeration Composting	SUSTAINABILITY	2020	https://doi.org/10.3390/su122410528
Imeni, SM et al., 2020	Techno-Economic Assessment of Anaerobic Co-digestion of Cattle Manure and Wheat Straw (Raw and Pre-treated) at Small to Medium Dairy Cattle Farms	WASTE AND BIOMASS VALORIZATION	2020	https://doi.org/10.1007/s12649-019-00728-4
Kuriya, SP et al., 2020	Impact assessment of different electric fields on the quality parameters of blueberry flavored dairy desserts processed by Ohmic Heating	FOOD RESEARCH INTERNATIONAL	2020	https://doi.org/10.1016/j.foodres.2020.109235
Awasthi, MK et al., 2020	Effect of biochar and bacterial inoculum additions on cow dung composting	BIORESOURCE TECHNOLOGY	2020	https://doi.org/10.1016/j.biortech.2019.122407
Sokolov, VK et al., 2021	Dairy manure acidification reduces CH4 emissions over short and long-term	ENVIRONMENTAL TECHNOLOGY	2021	https://doi.org/10.1080/09593330.2020.1714744
Aguirre-Villegas, HA et al., 2019	Anaerobic digestion, solid-liquid separation, and drying of dairy manure: Measuring constituents and modeling emission	SCIENCE OF THE TOTAL ENVIRONMENT	2019	https://doi.org/10.1016/j.scitotenv.2019.134059
Mainardis, M et al., 2019	Techno-economic feasibility of anaerobic digestion of cheese whey in small Italian dairies and effect of ultrasound pre-treatment on methane yield	JOURNAL OF ENVIRONMENTAL MANAGEMENT	2019	https://doi.org/10.1016/j.jenvman.2019.06.014
Canavari, M et al., 2019	Green marketing strategies in the dairy sector: Consumer-stated preferences for carbon footprint labels	STRATEGIC CHANGE-BRIEFINGS IN ENTREPRENEURIAL FINANCE	2019	https://doi.org/10.1002/jsc.2264
Zouaghi, S et al., 2019	Investigating the Effect of an Antifouling Surface Modification on the Environmental Impact of a Pasteurization Process: An LCA Study	ACS SUSTAINABLE CHEMISTRY & ENGINEERING	2019	https://doi.org/10.1021/acssuschemeng.8b05835
Olijhoek, DW et al., 2018	Methane production, rumen fermentation, and diet digestibility of Holstein and Jersey dairy cows being divergent in residual feed intake and fed at 2 forage-to-concentrate ratios	JOURNAL OF DAIRY SCIENCE	2018	https://doi.org/10.3168/jds.2017-14278
Mumladze, T et al., 2018	Sustainable approach to recycling of multilayer flexible packaging using switchable hydrophilicity solvents	GREEN CHEMISTRY	2018	https://doi.org/10.1039/c8gc01062e
Moejes, SN et al., 2018	Closed-loop spray drying solutions for energy efficient powder production	INNOVATIVE FOOD SCIENCE & EMERGING TECHNOLOGIES	2018	https://doi.org/10.1016/j.ifset.2018.01.005
Chen, JY et al., 2018	Hydrothermal Liquefaction Enhanced by Various Chemicals as a Means of Sustainable Dairy Manure Treatment	SUSTAINABILITY	2018	https://doi.org/10.3390/su10010230
Mercier-Bouchard, D et al., 2017	Process efficiency of casein separation from milk using polymeric spiral-wound microfiltration membranes	JOURNAL OF DAIRY SCIENCE	2017	https://doi.org/10.3168/jds.2017-13015
Bagheri, F et al., 2017	Real-time performance evaluation and potential GHG reduction in refrigerated trailers	INTERNATIONAL JOURNAL OF REFRIGERATION-REVUE INTERNATIONALE DU FROID	2017	https://doi.org/10.1016/j.ijrefrig.2016.09.008
Zhang, YX et al., 2024	Evaluation of solid-liquid separation of dairy manure with different separator screen sizes on the resource recovery and greenhouse gas emissions reduction	JOURNAL OF CLEANER PRODUCTION	2024	https://doi.org/10.1016/j.jclepro.2024.141680
Sarmikasoglou, E et al., 2024	Effects of cashew nut shell extract and monensin on in vitro ruminal fermentation, methane production, and ruminal bacterial community	JOURNAL OF DAIRY SCIENCE	2024	https://doi.org/10.3168/jds.2023-23669
Harrison, BP et al., 2024	Biochar-composting substantially reduces methane and air pollutant emissions from dairy manure	ENVIRONMENTAL RESEARCH LETTERS	2024	https://doi.org/10.1088/1748-9326/ad1ad2
Subhir, S et al., 2023	The impact of temperature on flux, protein transmission and energy usage during microfiltration of skim milk using polymeric membranes	INTERNATIONAL DAIRY JOURNAL	2023	https://doi.org/10.1016/j.idairyj.2023.105729
Zhang, F et al., 2023	The Action Potential of Antioxidant Grape Seed Proanthocyanidin as a Rumen Modifier to Mitigate Rumen Methanogenesis In Vitro	FERMENTATION-BASEL	2023	https://doi.org/10.3390/fermentation9060513
Berça, AS et al., 2023	Meta-analysis of the relationship between dietary condensed tannins and methane emissions by cattle	ANIMAL FEED SCIENCE AND TECHNOLOGY	2023	https://doi.org/10.1016/j.anifeedsci.2022.115564
Gioelli, F et al., 2022	Bio-Acidification of Cattle Slurry with Whey Reduces Gaseous Emission during Storage with Positive Effects on Biogas Production	SUSTAINABILITY	2022	https://doi.org/10.3390/su141912331
Rocha, RS et al., 2022	Ohmic heating treatment in high-protein vanilla flavored milk: Quality, processing factors, and biological activity	FOOD RESEARCH INTERNATIONAL	2022	https://doi.org/10.1016/j.foodres.2022.111827
Harrison, BP et al., 2022	Dairy Manure Co-composting with Wood Biochar Plays a Critical Role in Meeting Global Methane Goals	ENVIRONMENTAL SCIENCE & TECHNOLOGY	2022	https://doi.org/10.1021/acs.est.2c03467
Duarte, RV et al., 2022	A microbiological perspective of raw milk preserved at room temperature using hyperbaric storage compared to refrigerated storage	INNOVATIVE FOOD SCIENCE & EMERGING TECHNOLOGIES	2022	https://doi.org/10.1016/j.ifset.2022.103019
Villarroel-Schneider, J et al., 2022	Energy self-sufficiency and greenhouse gas emission reductions in Latin American dairy farms through massive implementation of biogas-based solutions	ENERGY CONVERSION AND MANAGEMENT	2022	https://doi.org/10.1016/j.enconman.2022.115670
Fang, C et al., 2022	Exploring the microbial mechanism of reducing methanogenesis during dairy manure membrane-covered aerobic composting at industrial scale	BIORESOURCE TECHNOLOGY	2022	https://doi.org/10.1016/j.biortech.2022.127214
Cai, YY et al., 2022	Research on the electrochemistry synergied cellulase enzymes strengthens the anaerobic fermentation of cow dung	ENVIRONMENTAL SCIENCE AND POLLUTION RESEARCH	2022	https://doi.org/10.1007/s11356-022-19802-x
Leonard, P et al., 2021	Deployment and Optimisation of a Pilot-Scale IASBR System for Treatment of Dairy Processing Wastewater	ENERGIES	2021	https://doi.org/10.3390/en14217365
Desole, MP et al., 2022	Life cycle assessment (LCA) of PET and PLA bottles for the packaging of fresh pasteurised milk: The role of the manufacturing process and the disposal scenario	PACKAGING TECHNOLOGY AND SCIENCE	2022	https://doi.org/10.1002/pts.2615
Sun, JP et al., 2021	Environmental impact assessment of milk packaging in Canada	JOURNAL OF CLEANER PRODUCTION	2021	https://doi.org/10.1016/j.jclepro.2021.129347
Martins, LF et al., 2024	Separate offering of forages and concentrates to lactating dairy cows: Effects on lactational performance, enteric methane emission, and efficiency of nutrient utilization	JOURNAL OF DAIRY SCIENCE	2024	https://doi.org/10.3168/jds.2023-24261
Lincoln, BJ et al., 2024	Process Integration and Electrification for retrofit: Case studies of milk evaporator systems	CASE STUDIES IN THERMAL ENGINEERING	2024	https://doi.org/10.1016/j.csite.2024.104601
Munoz, C et al., 2021	Long-Term and Carryover Effects of Supplementation with Whole Oilseeds on Methane Emission, Milk Production and Milk Fatty Acid Profile of Grazing Dairy Cows	ANIMALS	2021	https://doi.org/10.3390/ani11102978
Richardson, CM et al., 2021	Estimating methane coefficients to predict the environmental impact of traits in the Australian dairy breeding program	JOURNAL OF DAIRY SCIENCE	2021	https://doi.org/10.3168/jds.2021-20348
Cueva, SF et al., 2021	Lactational performance, rumen fermentation, and enteric methane emission of dairy cows fed an amylase-enabled corn silage	JOURNAL OF DAIRY SCIENCE	2021	https://doi.org/10.3168/jds.2021-20251
Katwal, S et al., 2021	Antimethanogenic effects of soybean straw and seaweed (Sargassum johnstonii) based total mixed ration in crossbred cows	INDIAN JOURNAL OF DAIRY SCIENCE	2021	https://doi.org/10.33785/IJDS.2021.v74i06.005
Feng, XY et al., 2020	Net reductions in greenhouse gas emissions from feed additive use in California dairy cattle	PLOS ONE	2020	https://doi.org/10.1371/journal.pone.0234289
Lee, DJ et al., 2020	Catalytic pyrolysis of cow manure over a Ni/SiO2 catalyst using CO2 as a reaction medium	ENERGY	2020	https://doi.org/10.1016/j.energy.2020.117077
Moate, PJ et al., 2020	Influence of proportion of wheat in a pasture-based diet on milk yield, methane emissions, methane yield, and ruminal protozoa of dairy cows	JOURNAL OF DAIRY SCIENCE	2020	https://doi.org/10.3168/jds.2019-17514
Zeb, I et al., 2019	Enhanced treatment of flush-dairy manure in anaerobic sequencing batch reactors using a cationic polymer	BIOSYSTEMS ENGINEERING	2019	https://doi.org/10.1016/j.biosystemseng.2019.07.010
Guyader, J et al., 2017	Comparison of greenhouse gas emissions from corn- and barley-based dairy production systems in Eastern Canada	AGRICULTURAL SYSTEMS	2017	https://doi.org/10.1016/j.agsy.2016.12.002
Storlien, TM et al., 2017	Supplementation with crushed rapeseed causes reduction of methane emissions from lactating dairy cows on pasture	ANIMAL PRODUCTION SCIENCE	2017	https://doi.org/10.1071/AN15287
Alstrup, L et al., 2015	Effect of fat supplementation and stage of lactation on methane production in dairy cows	ANIMAL FEED SCIENCE AND TECHNOLOGY	2015	https://doi.org/10.1016/j.anifeedsci.2015.05.017
Khurana, R et al., 2023	Effect of a garlic and citrus extract supplement on performance, rumen fermentation, methane production, and rumen microbiome of dairy cows	JOURNAL OF DAIRY SCIENCE	2023	https://doi.org/10.3168/jds.2022-22838
Flores-Santiago, ED et al., 2022	Reduction of Enteric Methane Emissions in Heifers Fed Tropical Grass-Based Rations Supplemented with Palm Oil	FERMENTATION-BASEL	2022	https://doi.org/10.3390/fermentation8080349
Manzanilla-Pech, CIV et al., 2022	Selecting for Feed Efficient Cows Will Help to Reduce Methane Gas Emissions	FRONTIERS IN GENETICS	2022	https://doi.org/10.3389/fgene.2022.885932
Cristina Molina-Botero, I et al., 2024	Methane Emission, Carbon Footprint and Productivity of Specialized Dairy Cows Supplemented with Bitter Cassava (<i>Manihot esculenta</i> Crantz)	ANIMALS	2024	https://doi.org/10.3390/ani14010019
Dijkstra, J. et al., 2018	<i>Short communication</i>: Antimethanogenic effects of 3-nitrooxypropanol depend on supplementation dose, dietary fiber content, and cattle type	JOURNAL OF DAIRY SCIENCE	2018	https://doi.org/10.3168/jds.2018-14456
Feng, XY et al., 2023	Dairy manure nutrient recovery reduces greenhouse gas emissions and transportation cost in a modeling study	FRONTIERS IN ANIMAL SCIENCE	2023	https://doi.org/10.3389/fanim.2023.1134817
Petersen, Soren O. et al., 2012	Effects of Cattle Slurry Acidification on Ammonia and Methane Evolution during Storage	JOURNAL OF ENVIRONMENTAL QUALITY	2012	https://doi.org/10.2134/jeq2011.0184
Shi, Rui et al., 2024	Balancing farm profit and greenhouse gas emissions along the dairy production chain through breeding indices	JOURNAL OF CLEANER PRODUCTION	2024	https://doi.org/10.1016/j.jclepro.2024.142099
Hu, Yihuai et al., 2021	Systematic Review of Dairy Processing Sludge and Secondary STRUBIAS Products Used in Agriculture	FRONTIERS IN SUSTAINABLE FOOD SYSTEMS	2021	https://doi.org/10.3389/fsufs.2021.763020
Roibas, Laura et al., 2016	An analysis on how switching to a more balanced and naturally improved milk would affect consumer health and the environment	SCIENCE OF THE TOTAL ENVIRONMENT	2016	https://doi.org/10.1016/j.scitotenv.2016.05.141
Eustachio Colombo, Patricia et al., 2021	Designing Nutritionally Adequate and Climate-Friendly Diets for Omnivorous, Pescatarian, Vegetarian and Vegan Adolescents in Sweden Using Linear Optimization	NUTRIENTS	2021	https://doi.org/10.3390/nu13082507
Valsasina, Lucia et al., 2017	Life cycle assessment of emerging technologies: The case of milk ultra-high pressure homogenisation	JOURNAL OF CLEANER PRODUCTION	2017	https://doi.org/10.1016/j.jclepro.2016.11.059
Lemay, Noemie et al., 2019	Voltage spike and electroconvective vortices generation during electrodialysis under pulsed electric field: Impact on demineralization process efficiency and energy consumption	INNOVATIVE FOOD SCIENCE & EMERGING TECHNOLOGIES	2019	https://doi.org/10.1016/j.ifset.2018.12.004
Alsaedi, Ali Wali M. et al., 2023	Non-thermal pasteurization of milk by an innovative energy-saving moderate electrical field equipped with elongated electrodes and process optimization	INNOVATIVE FOOD SCIENCE & EMERGING TECHNOLOGIES	2023	https://doi.org/10.1016/j.ifset.2023.103445
Yapicioglu, Pelin et al., 2023	Experimental and statistical modeling of the effect of process modification and wastewater characterization on greenhouse gas emissions for a dairy industry wastewater treatment plant: a minimization approach	JOURNAL OF WATER AND CLIMATE CHANGE	2023	https://doi.org/10.2166/wcc.2023.312
Roque, Breanna M. et al., 2019	Inclusion of <i>Asparagopsis armata</i> in lactating dairy cows' diet reduces enteric methane emission by over 50 percent	JOURNAL OF CLEANER PRODUCTION	2019	https://doi.org/10.1016/j.jclepro.2019.06.193
Asioli, D. et al., 2023	Consumers' valuation for low-carbon emission and low-saturated fat butter	FOOD QUALITY AND PREFERENCE	2023	https://doi.org/10.1016/j.foodqual.2023.104859

## Sheet: 前三个表格文献统计65
Capper and Cady, 2012	A comparison of the environmental impact of Jersey compared with Holstein milk for cheese production
Coluccia et al., 2022	Assessing the carbon footprint across the supply chain: Cow milk vs soy drink
Sejian et al., 2018	Assessment of the carbon footprint of four commercial dairy production systems in Australia using an integrated farm system model
Egas et al., 2020	CalcPEFDairy: A Product Environmental Footprint compliant tool for a tailored assessment of raw milk and dairy products
Rossi et al., 2024	Carbon Footprint and Carbon Sink of a Local Italian Dairy Supply Chain
Lambotte et al., 2020	Carbon footprint and economic performance of dairy farms: The case of protected designation of origin farms in France
Zhao et al., 2017	Carbon footprint assessment for a local branded pure milk product: a lifecycle-based approach.
Misganaw et al., 2020	Carbon footprint in the downstream dairy value chain in Ziway‑Hawassa milk shed, Ethiopia
Vergé et al., 2013	Carbon footprint of Canadian dairy products: calculations and issues
Vagnoni et al., 2017	Carbon footprint of cheese produced on milk from Holstein and Jersey cows fed hay differing in herb content
Balcha et al., 2022	Carbon footprint of cows’ milk: a case study of peri-urban and urban dairy farms within Mekelle milk-shed, Ethiopia
Maria de Léis et al., 2014	Carbon footprint of milk production in Brazil: a comparative case study
Garg et al., 2016	Carbon footprint of milk production under smallholder dairying in Anand district of Western India: a cradle-to-farm gate life cycle assessment
Gonzalez-Quintero et al., 2021	Carbon footprint, non-renewable energy and land use of dual-purpose cattle systems in Colombia using a life cycle assessment approach
Hietala et al., 2014	Carbon footprints of organic dairying in six European countries—real farm data analysis
Styles et al., 2017	Climate mitigation by dairy intensification depends on intensive use of spared grassland
Mazzetto et al., 2020	Comparing the environmental efficiency of milk and beef production through life cycle assessment of interconnected cattle systems
Huerta et al., 2018	Comparison of greenhouse gas emissions from Mexican intensive dairy farms
Famiglietti et al., 2019	Development and testing of the Product Environmental Footprint Milk Tool: A comprehensive LCA tool for dairy products
Schueler et al., 2018	Discrimination of milk carbon footprints from different dairy farms when using IPCC Tier 1 methodology for calculation of GHG emissions from managed soils
Darré et al., 2020	Do pasture-based mixed dairy systems with higher milk production have lower environmental impacts? A Uruguayan case study
van Middelaar et al. (2011)	Eco-efficiency in the production chain of Dutch semi-hard cheese
Ioanna Malliaroudaki et al., 2022	Energy management for a net zero dairy supply chain under climate change
van Boxmeer et al., 2021	Environmental and economic performance of Dutch dairy farms on peat soil
Canellada et al., 2018	Environmental impact of cheese production: A case study of a small-scale factory in southern Europe and global overview of carbon footprint
Wang et al., 2018	Environmental impacts and resource use of milk production on the North China Plain, based on life cycle assessment
Finnegan et al., 2017	Environmental impacts of milk powder and butter manufactured in the Republic of Ireland
Berlin, 2002	Environmental life cycle assessment (LCA) of Swedish semi-hard cheese
González-García et al., 2013	Environmental life cycle assessment of a dairy product: the yoghurt
González-García et al., 2013b	Environmental life cycle assessment of a Galician cheese: San Simon da Costa
Riva et al., 2016	Environmental life cycle assessment of Italian mozzarella cheese: Hotspots and improvement opportunities
Djekic et al.， 2014	Environmental life-cycle assessment of various dairy products
González-García et al., 2013a	Environmental performance of a Portuguese mature cheese-making dairy mill
Torquati et al.,2015	Evaluating the CO2 emission of the milk supply chain in Italy: An exploratory study
Hawkins et al., 2021	Feeding efficiency gains can increase the greenhouse gas mitigation potential of the Tanzanian dairy sector
Finnegan et al., 2017	Global warming potential associated with Irish milk powder production
Nutter et al., 2013	Greenhouse gas emission analysis for USA fluid milk processing plants: Processing, packaging, and distribution
Thoma et al., 2013	Greenhouse gas emissions from milk production and consumption in the United States: A cradle-to-grave life cycle assessment circa 2008
FAO, 2010	Greenhouse Gas Emissions from the Dairy Sector—A Life Cycle Assessment
Flysjö, 2012	Greenhouse gas emissions in milk and dairy product chains
Daneshi et al., 2014	Greenhouse gas emissions of packaged fluid milk production in Tehran
Sheane et al., 2011	Identifying Opportunities to Reduce the Carbon Footprint Associated with the Scottish Dairy Supply Chain – Main Report
Bava et al., 2018	Impact assessment of traditional food manufacturing: the case of Grana Padano cheese
Jayasundara et al., 2019	Improving farm profitability also reduces the carbon footprint of milk production in intensive dairy production systems
Liao et al., 2020	Large-scale regionalised LCA shows that plant-based fat spreads have a lower climate, land occupation and water scarcity impact than dairy butter
Kumar et al., 2021	Life cycle assessment (LCA) of dairy processing industry: A case study of North India
Jungbluth et al., 2018	Life cycle assessment of a detailed dairy processing model and recommendations for the allocation to single products
Kim et al., 2013	Life cycle assessment of cheese and whey production in the USA
Santos et al., 2017	Life cycle assessment of cheese production process in a small-sized dairy industry in Brazil
Fantin et al., 2012	Life cycle assessment of Italian high quality milk production. A comparison with an EPD study
Yan et al., 2018	Life cycle assessment of multi-product dairy processing using Irish butter and milk powders as an example
Doublet et al.，2013	Life cycle assessment of Romanian beef and dairy products
Heller et al., 2011	Life Cycle Energy and Greenhouse Gas Analysis of a Large-Scale Vertically Integrated Organic Dairy in the United States
Flysjö et al., 2014	Method to assess the carbon footprint at product level in the dairy industry
Llontop et al., 2022	Milk carbon footprint of silvopastoral dairy systems in the Northern Peruvian Amazon
Üçtuğ et al., 2019	nvironmental life cycle assessment of yoghurt supply to consumer in Turkey
Cortés et al., 2021	Pursuing the route to eco-efficiency in dairy production: The case of Galician area
Clune et al., 2017	Systematic review of greenhouse gas emissions for different fresh food categories
Ledgard et al., 2020	Temporal, spatial, and management variability in the carbon footprint of New Zealand milk
Gaillac et al., 2021	The carbon footprint of meat and dairy proteins: A practical perspective to guide low carbon footprint dietary choices
Gross et al., 2022	The carbon footprint of milk during the conversion from conventional to organic production on a dairy farm in central Germany
Titis Apdini et al., 2021	Understanding variability in greenhouse gas emission estimates of smallholder dairy farms in Indonesia
Wilkes et al., 2020	Variation in the carbon footprint of milk production on smallholder dairy farms in central Kenya
Vasilaki et al., 2016	Water and carbon footprint of selected dairy products: a case study in Catalonia
O'Brien et al., 2014	An appraisal of carbon footprint of milk from commercial grass-based dairy farms in Ireland according to a certified life cycle assessment methodology
